# Supplementary material for: Sustainable design of high-performance multifunctional carbon electrodes by one-step laser carbonization for supercapacitors and dopamine sensors
Source: Royal Society of Chemistry journal article supplement (doi:10.1039/d4nr00588k), 2024-01-01
Supplement: d4nr00588k1.pdf [file d4nr00588k1.pdf]

## Supporting Information

### **Sustainable design of high-performance multifunctional carbon electrodes by one-step laser carbonization for supercapacitors and dopamine sensors**

Sanghwa Moon,<sup>a</sup> Evgeny Senokos,<sup>a</sup> Vanessa Trouillet,<sup>b</sup> Felix Loeffler\*<sup>a</sup> and Volker Strauss\*<sup>a</sup>

<sup>a</sup> Max Planck Institute of Colloids and Interfaces, Am Mühlenberg 1, 14476 Potsdam, Germany

<sup>b</sup> Institute for Applied Materials (IAM) and Karlsruhe Nano Micro Facility (KNMFi), Karlsruhe Institute of Technology (KIT), Hermann-von-Helmholtz-Platz 1, 76344 Eggenstein-Leopoldshafen, Germany

\* E-mail: [felix.loeffler@mpikg.mpg.de](mailto:felix.loeffler@mpikg.mpg.de), [volker.strauss@mpikg.mpg.de](mailto:volker.strauss@mpikg.mpg.de)

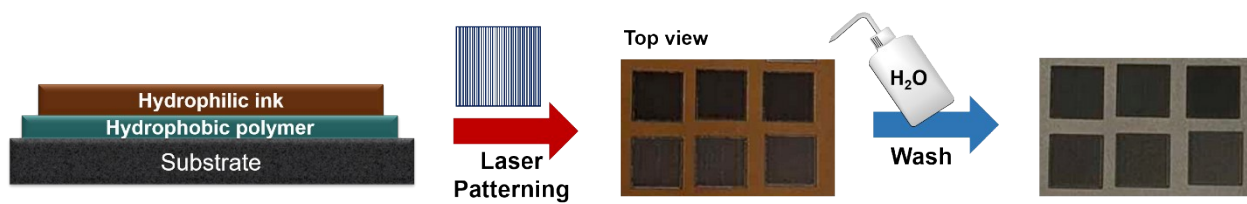

**Figure S1.** Schematic images showing the process of LP-C fabrication.

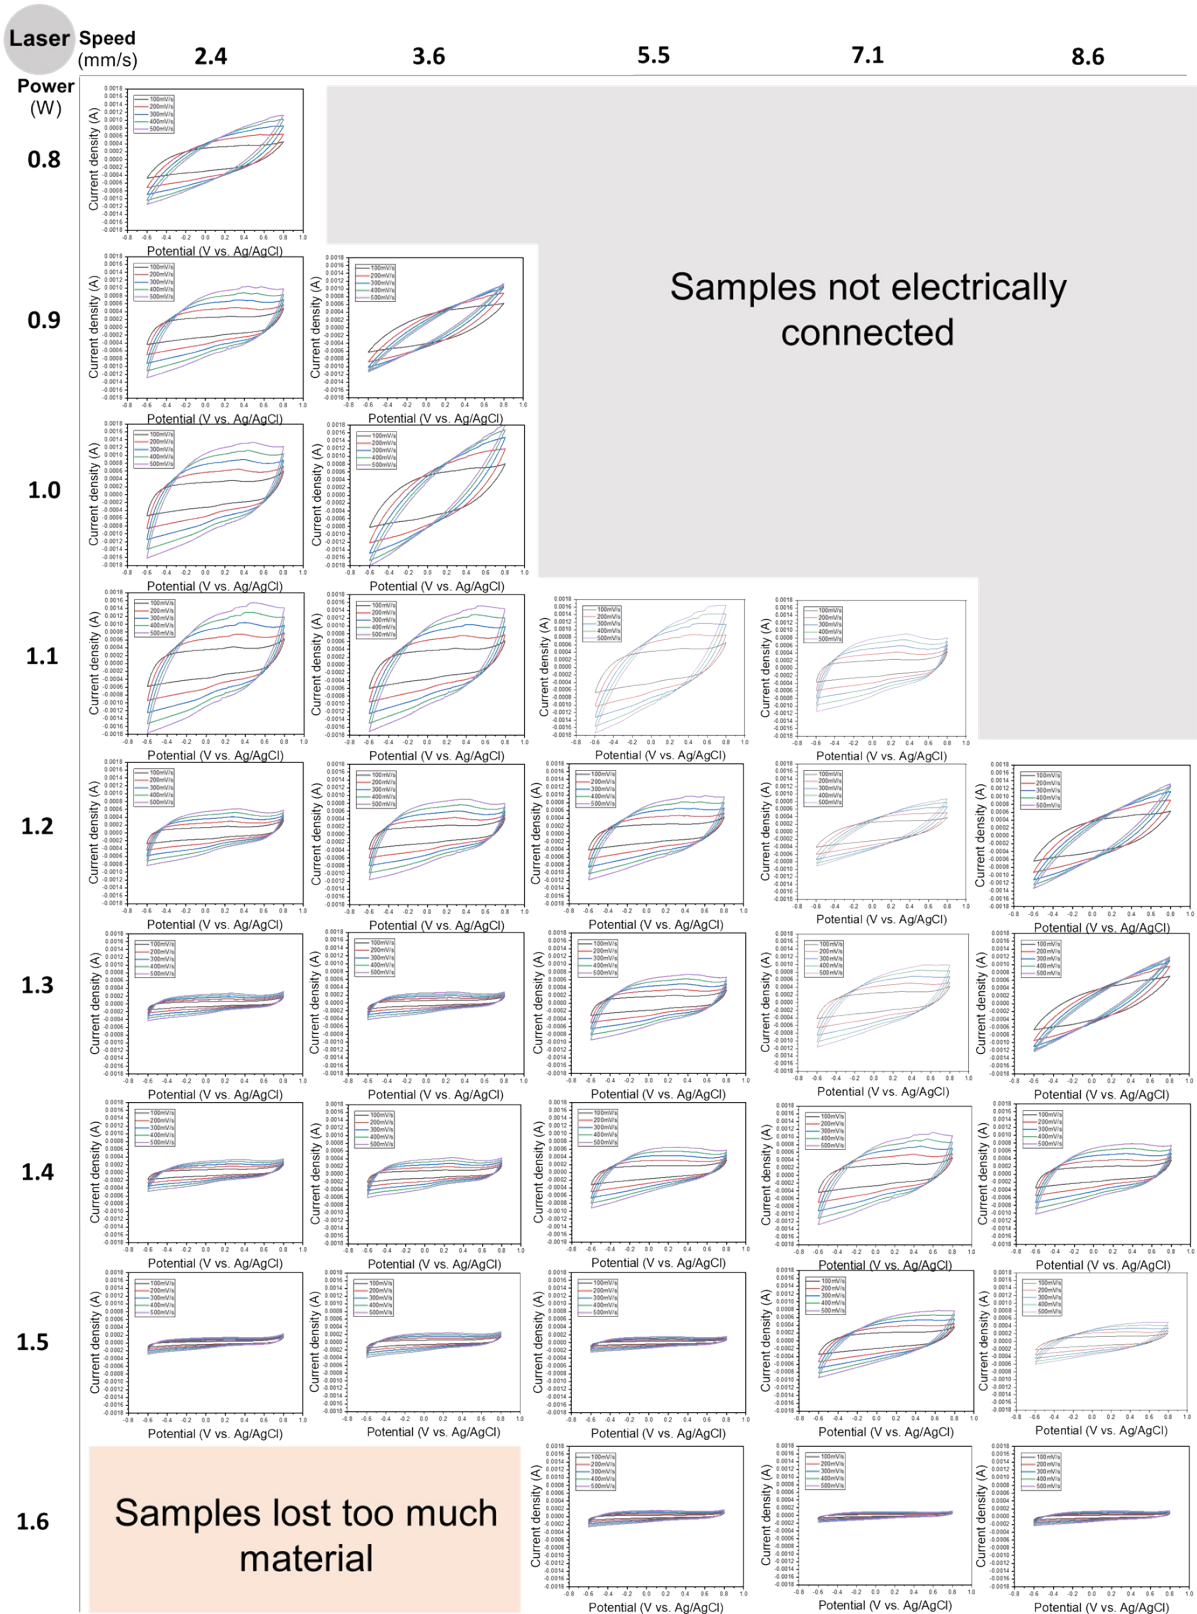

Figure S2. Cyclic voltammetry (CV) curves with varying laser power and speed.

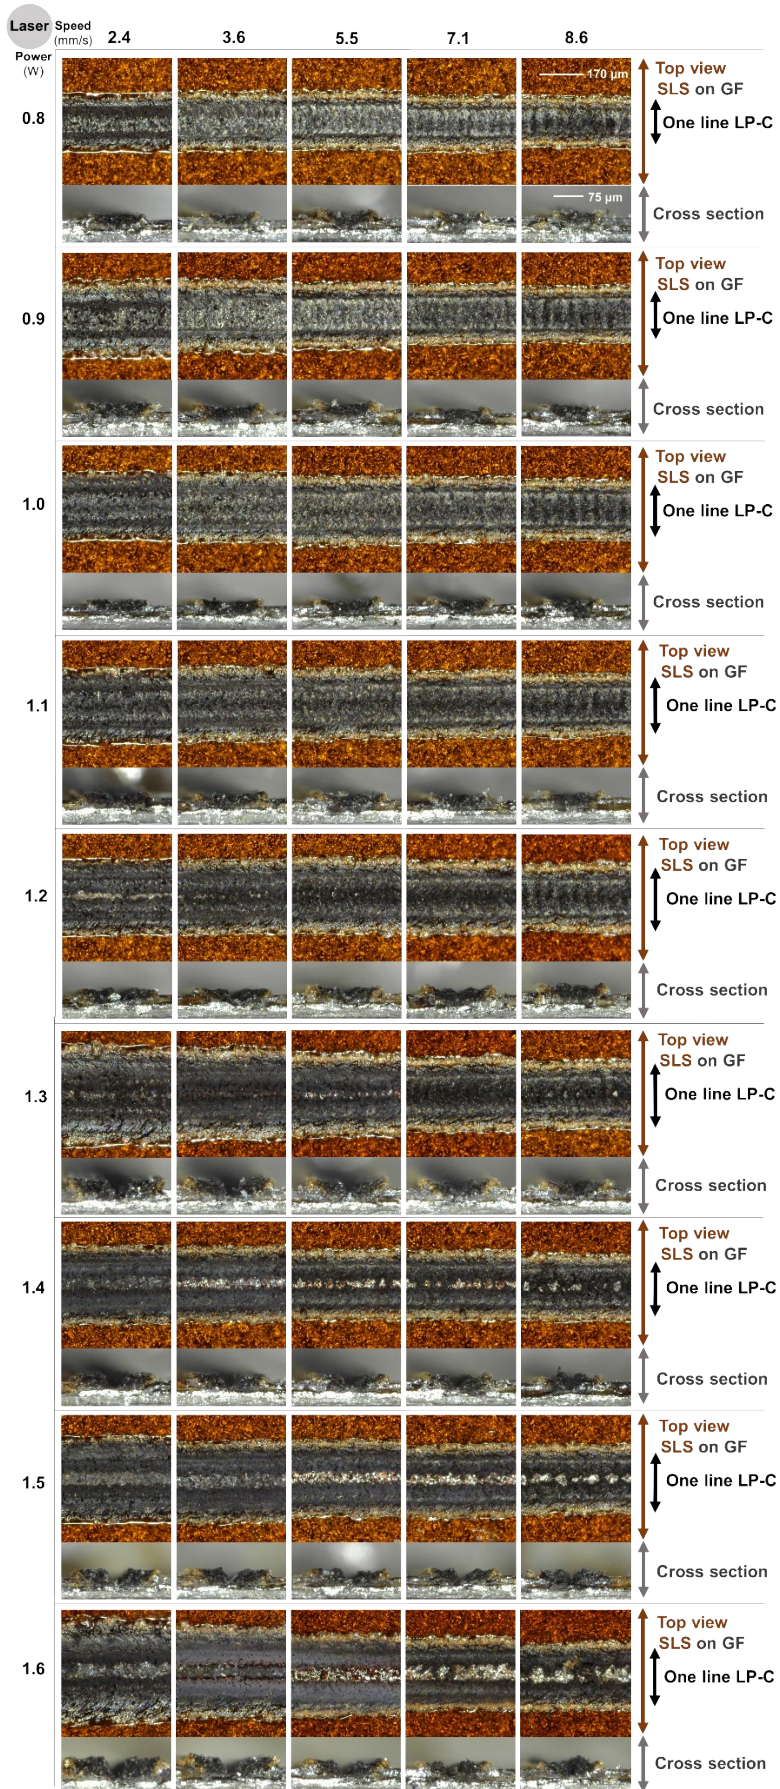

**Figure S3.** Optical microscope images of a laser-carbonized line obtained in top view and cross-section view with varying laser parameters.

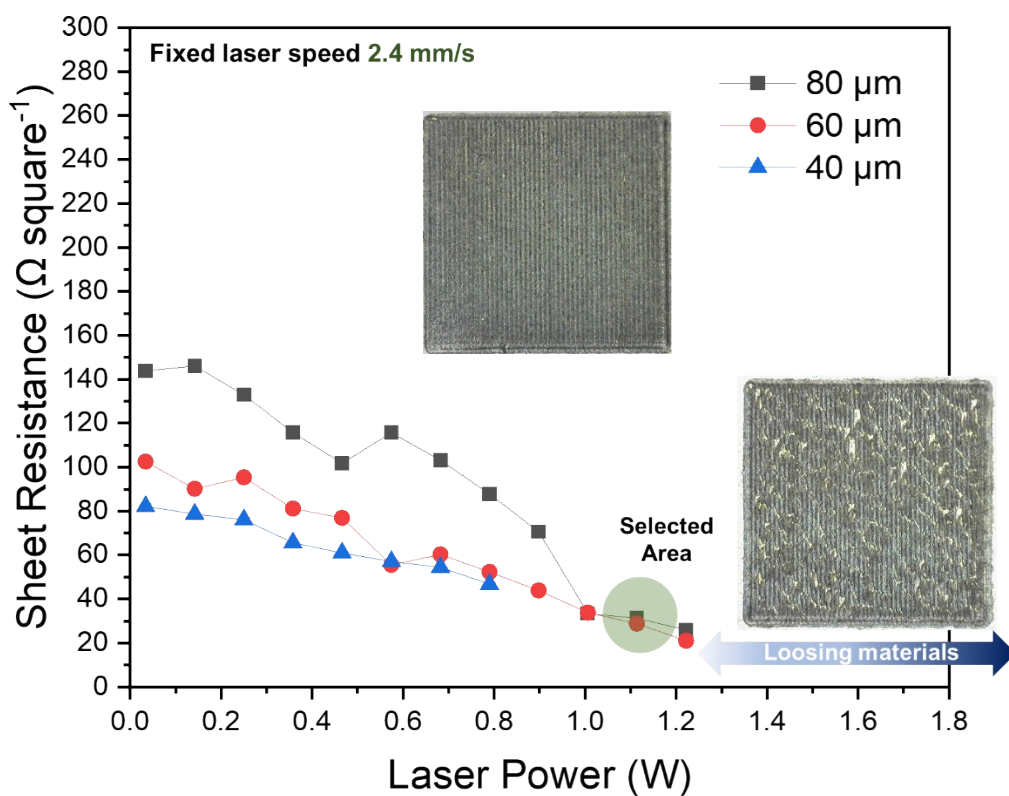

**Figure S4.** Sheet resistance as a function of sodium lignosulfonate precursor film thickness and laser power at the fixed laser speed ( $2.4 \text{ mm s}^{-1}$ ).

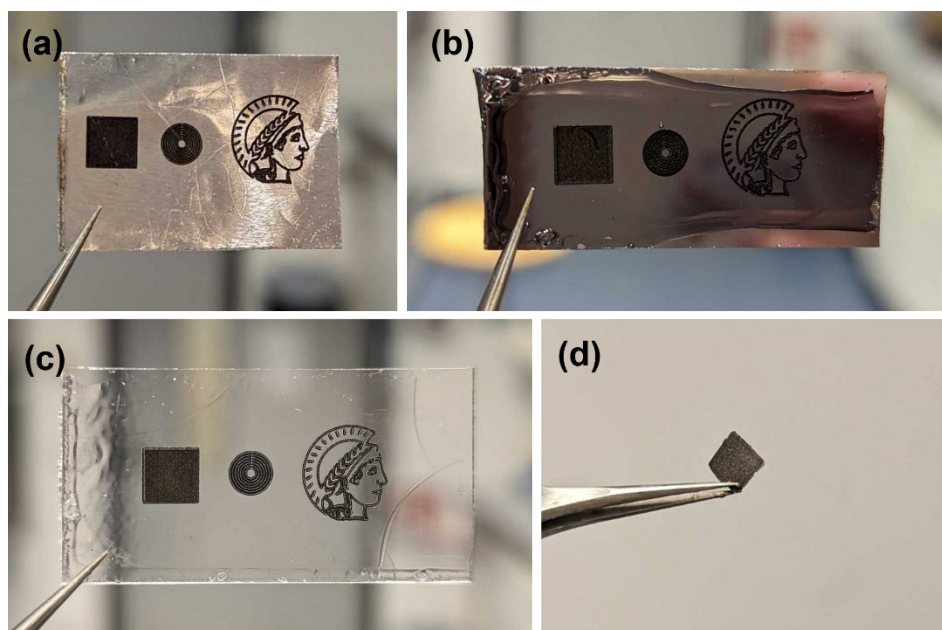

**Figure S5.** LP-C on (a) Al foil, (b) Si wafer, and (c) glass substrates with different laser patterns; (d) free-standing LP-C.

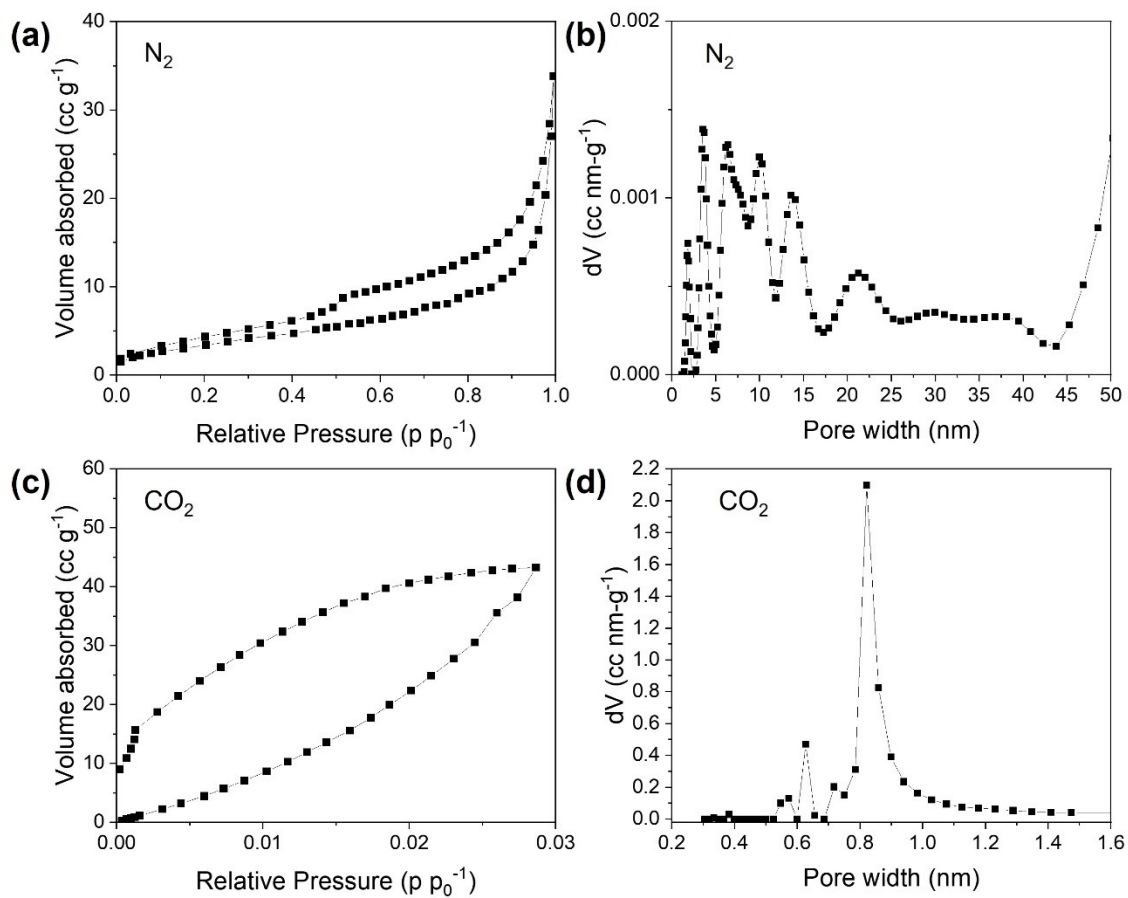

**Figure S6.** (a) N<sub>2</sub> adsorption–desorption isotherms and (b) pore size distribution of LP-C powder (N<sub>2</sub>); (c) CO<sub>2</sub> adsorption–desorption isotherms and (d) pore size distribution of LP-C powder (CO<sub>2</sub>).

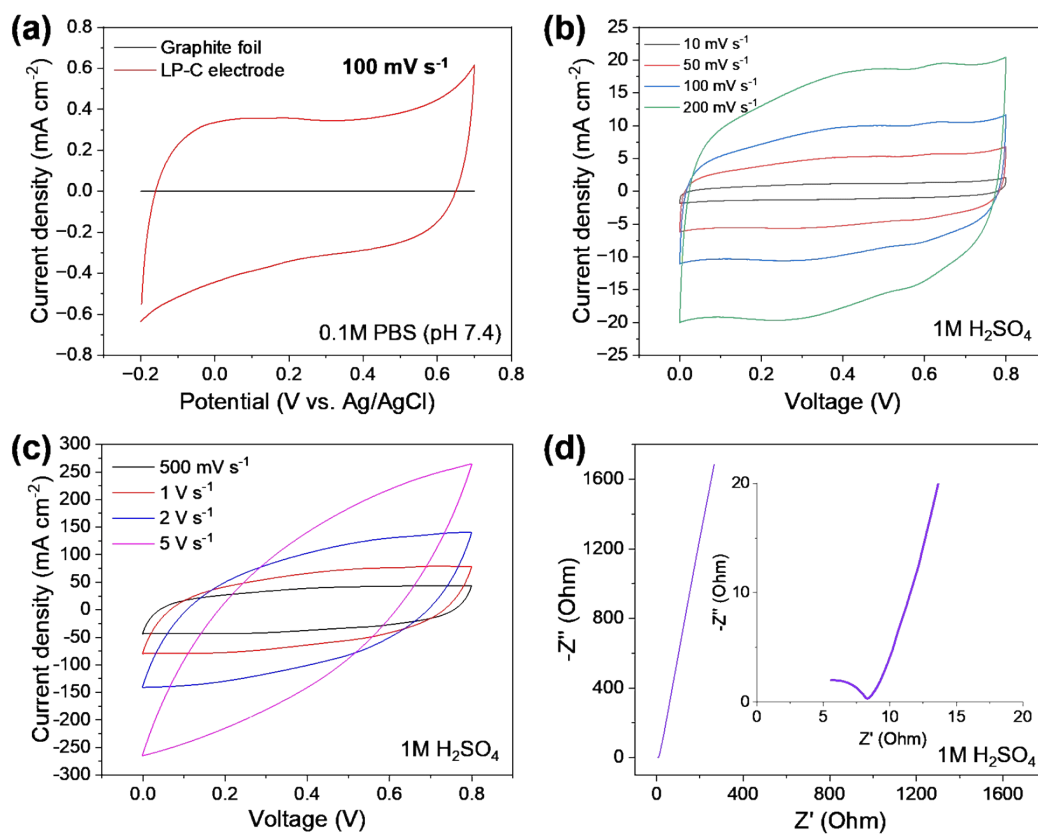

**Figure S7.** Cyclic voltammetry (CV) curves of LP-C measured with a 3-electrode system (a) in 0.1M PBS (pH 7.4) at 100 mV s<sup>-1</sup>, (b, c) in 1M H<sub>2</sub>SO<sub>4</sub> as a function of voltage scan rate and (d) Nyquist plot.

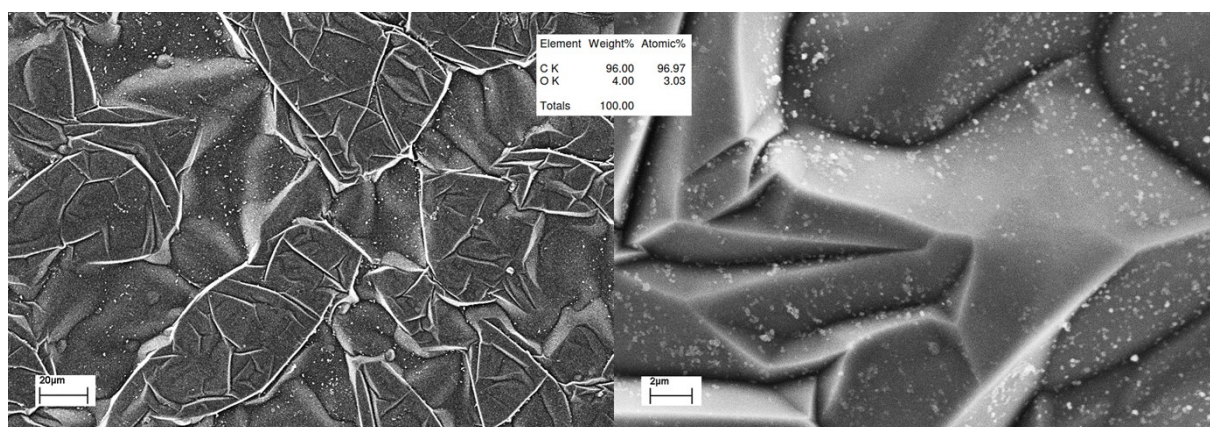

**Figure S8.** Scanning electron microscope (SEM) images of bare graphite foil.

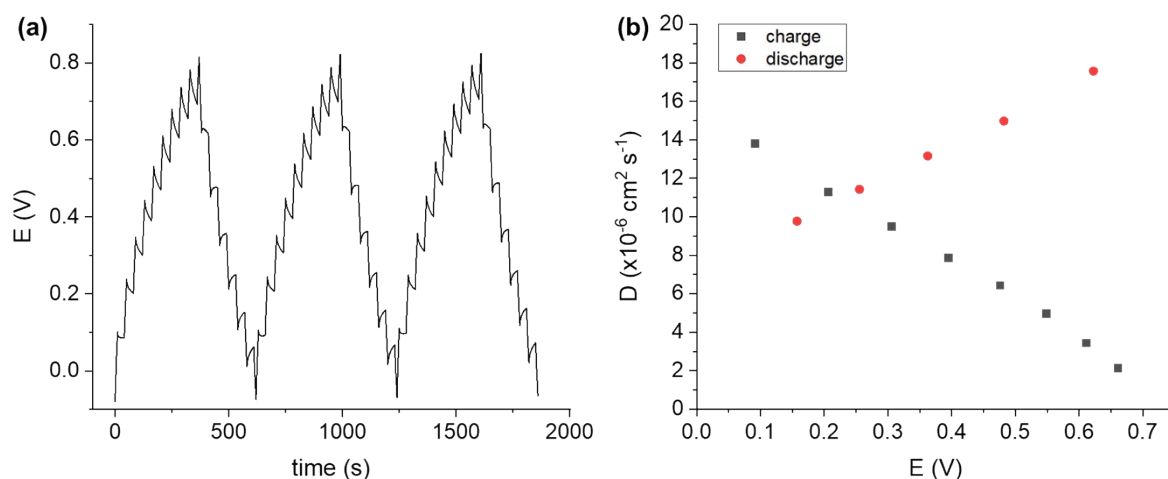

**Figure S9.** (a) Charge and discharge curves of the galvanostatic intermittent titration technique (GITT) test and (b) diffusion coefficient ( $D$ ) values as a function of potential tested by cycling a symmetrical cell at  $50 \text{ mA g}^{-1}$  for 10 sec followed by an open circuit relaxation period of 30 s.

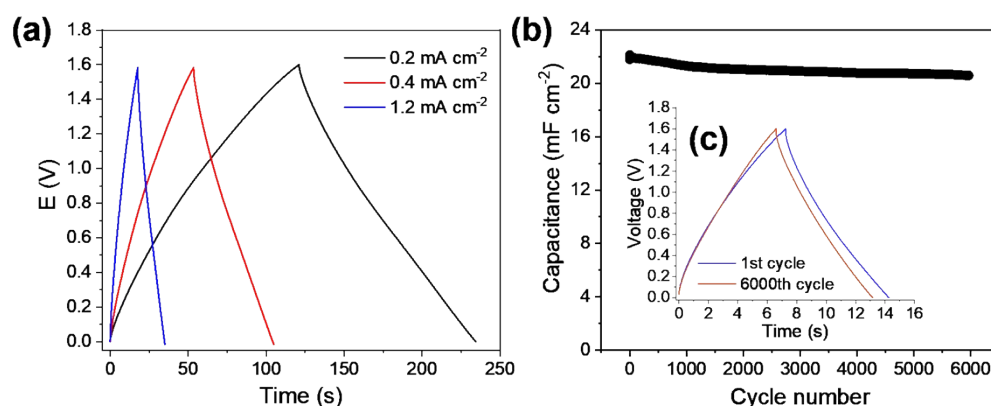

**Figure S10.** Galvanostatic charge-discharge (GCD) profiles in  $17\text{M NaClO}_4$  (a) with different current densities, (b) GCD cyclability test showing the retention of specific areal capacitance at  $2.2 \text{ mA cm}^{-2}$  and (c) GCD profiles of the 1<sup>st</sup> and 6000<sup>th</sup> cycles.

| Ref       | Precursor             | Laser $\lambda$ ( $\mu\text{m}$ ) | BET ( $\text{m}^2 \text{g}^{-1}$ )         | Current collector          | Electrolyte                        | Capacitance ( $\text{mF cm}^{-2}$ ) | Energy Density ( $\mu\text{Wh cm}^{-2}$ ) | Power Density ( $\text{mW cm}^{-2}$ ) | Retention / cycles / Current density ( $\text{mA cm}^{-2}$ ) | Current density range ( $\text{mA cm}^{-2}$ ) |
|-----------|-----------------------|-----------------------------------|--------------------------------------------|----------------------------|------------------------------------|-------------------------------------|-------------------------------------------|---------------------------------------|--------------------------------------------------------------|-----------------------------------------------|
| This work | Sodium lignosulfonate | 10.6                              | 13 ( $\text{N}_2$ ), 504 ( $\text{CO}_2$ ) | Graphite foil              | $\text{H}_2\text{SO}_4$            | 38.8                                | 1.3 (1.7)                                 | 11.4 (14.9)                           | 81% / 20k / 2.2                                              | 0.44 - 44                                     |
|           |                       |                                   |                                            |                            | $17\text{M NaClO}_4$               | 32.8                                | 4.3 (5.8)                                 | 16 (21.7)                             | 93% / 6k / 2.2                                               |                                               |
| 35        | Kraft Lignin/PVA      | 10.6                              | 338.3 ( $\text{N}_2$ )                     | Copper strip, Silver paint | $\text{H}_2\text{SO}_4/\text{PVA}$ | 17                                  | 2.6                                       | 2.2                                   | 99.2% / 12k / 2                                              | 0.05 - 2                                      |
| 36        | Lignin/PEO            | 10.6                              | -                                          | Copper tape, Silver paint  | $\text{H}_2\text{SO}_4/\text{PVA}$ | 25.4                                | 3.5                                       | 0.8                                   | 93% / 4.5k / 0.2                                             | 0.1 - 1                                       |
| 37        | Kraft Lignin/PEO      | 10.6                              | -                                          | Copper tape, Silver paint  | $\text{H}_2\text{SO}_4/\text{PVA}$ | 2.5                                 | 0.3                                       | 0.03                                  | 91% / 10k / 0.02                                             | 0.01 - 0.02                                   |
| 38        | Agglomerate d Cork    | 1.06                              | -                                          | -                          | $\text{H}_2\text{SO}_4/\text{PVA}$ | 1.4                                 | 0.1                                       | 0.08                                  | 106% / 10k / 0.05                                            | 0.05 - 0.1                                    |
| 39        | Nageia fleuryi leaves | 0.346                             | -                                          | Copper foil, Silver paste  | $\text{H}_2\text{SO}_4/\text{PVA}$ | 35.3                                | 1.2                                       | 0.3                                   | 99% / 50k / -                                                | 0.005                                         |

**Table S1.** Comparison of the performance and material properties of laser-carbonized supercapacitors using biomass-derived precursors.



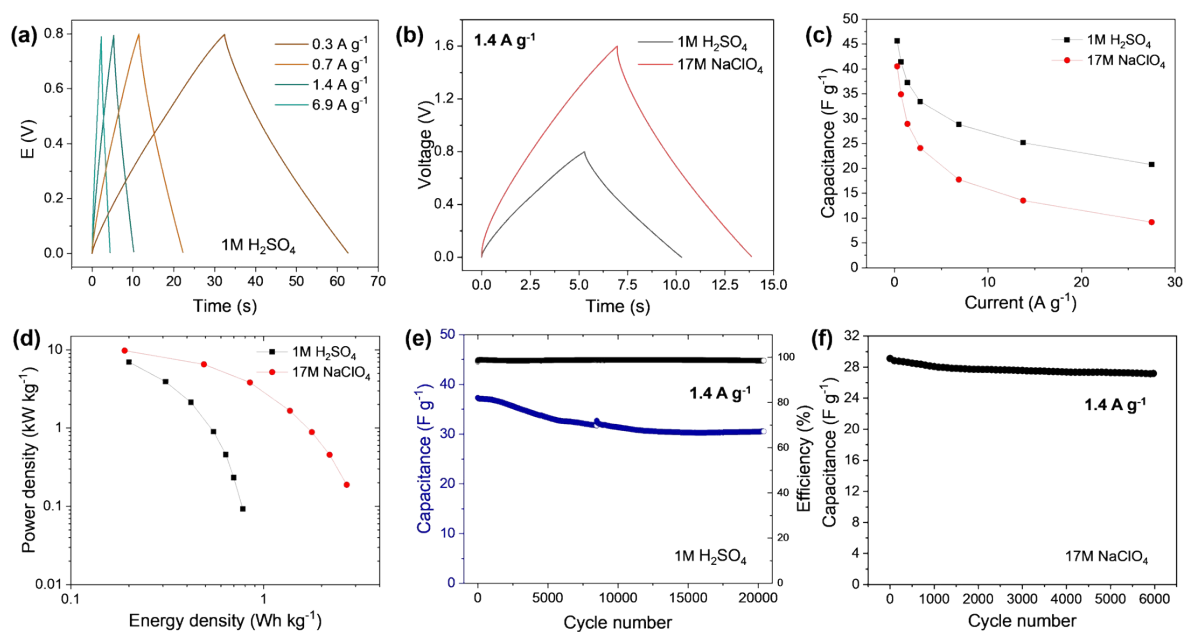

**Figure S11.** Gravimetric supercapacitor performance of LP-C electrodes using a symmetrical cell: (a) Schematic image of the EDLC charge-discharge process; (b) Galvanostatic charge and discharge (GCD) profiles in 1M H<sub>2</sub>SO<sub>4</sub> at different current densities and (c) at a current density of 1.4 A g<sup>-1</sup> for different electrolytes; (d) Specific gravimetric capacitance as a function of current density; (e) Ragone plot; (f) Long-term cyclability at a current density of 1.4 A g<sup>-1</sup> showing the retention of specific areal capacitance and coulombic efficiency.

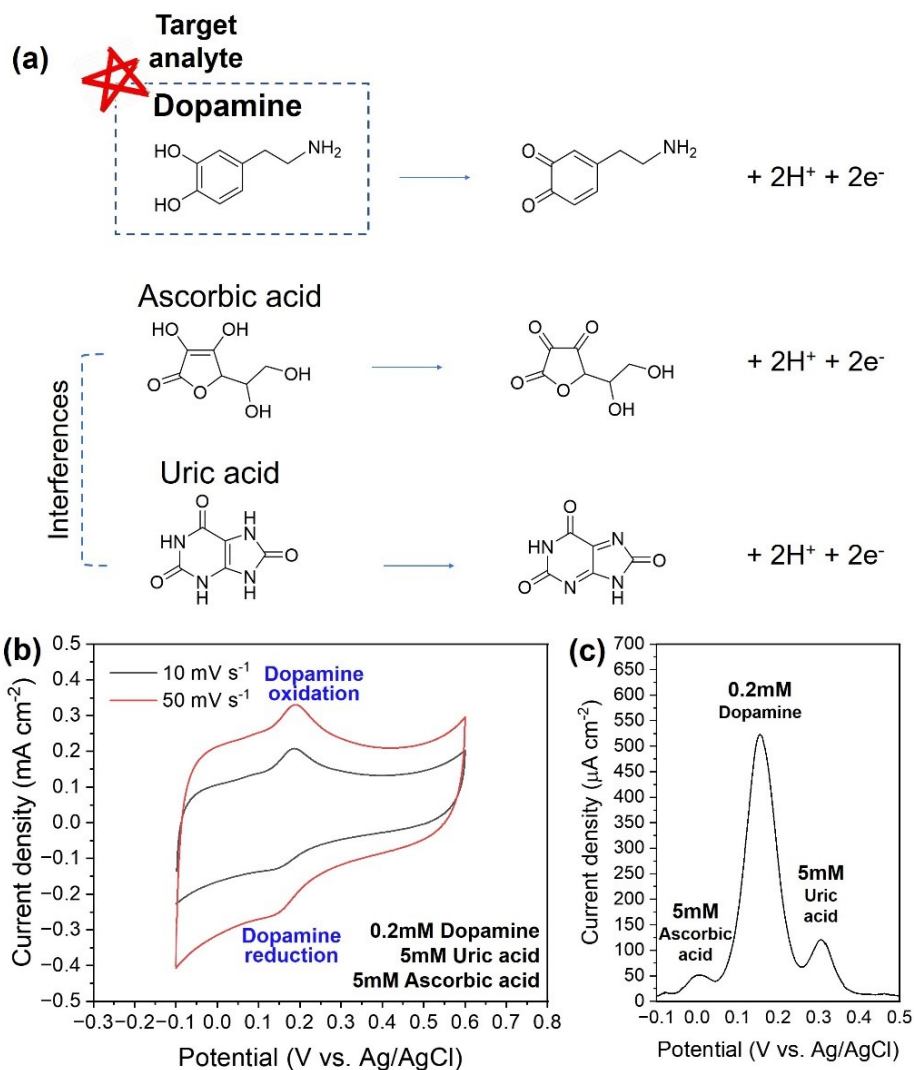

**Figure S12.** (a) Oxidation process of dopamine (DA), ascorbic acid (AA) and uric acid (UA), (b) cyclic voltammetry (CV) and (c) differential pulse voltammetry (DPV) curves of DA, AA and UA ternary mixtures

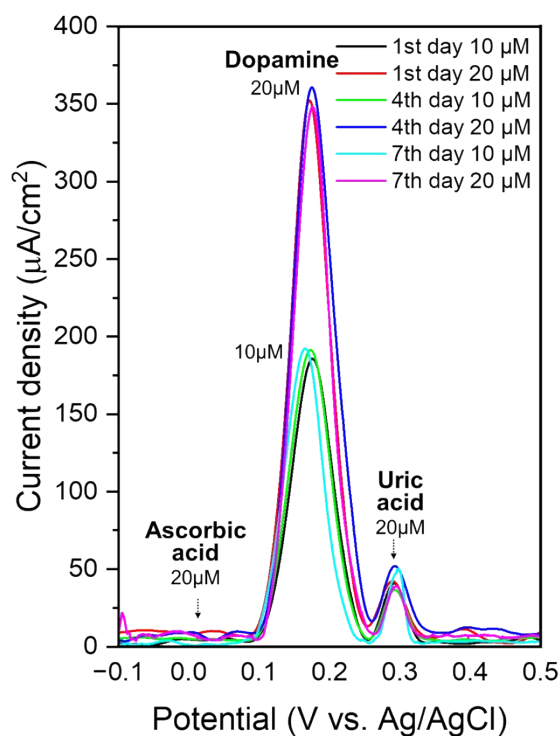

**Figure S13.** (a) Differential pulse voltammetry (DPV) detection curves of ternary mixtures (dopamine (10 and 20  $\mu\text{M}$ ), uric acid (20  $\mu\text{M}$ ) and ascorbic acid (20  $\mu\text{M}$ )) on days 1, 4 and 7.

| Ref       | Precursor                         | Laser $\lambda$    | Current collector | Electrolyte       | LOD ( $\mu\text{M}$ )<br>Measured /<br>Extrapolated | Sensitivity<br>( $\mu\text{A } \mu\text{M}^{-1} \text{cm}^{-2}$ ) | Linear range           | $R^2$ | Detection technique |
|-----------|-----------------------------------|--------------------|-------------------|-------------------|-----------------------------------------------------|-------------------------------------------------------------------|------------------------|-------|---------------------|
| This work | Sodium lignosulfonate             | 10.6 $\mu\text{m}$ | Graphite foil     | 0.1M PBS (pH 7.4) | 0.1 / 0.5                                           | 13.38                                                             | 0.1 – 20 $\mu\text{M}$ | 0.996 | CV, DPV             |
| 49        | Kraft lignin/Cellulose nanofibers | 10.6 $\mu\text{m}$ | Glassy carbon     | PBS               | 5 / 3.4                                             | 4.39                                                              | 5 – 40 $\mu\text{M}$   | 0.995 | CV, DPV             |
| 50        | Alkaline lignin/Ag NPs/PVA        | 800 nm             | -                 | 0.1M PBS (pH 7.4) | 1 / 0.098                                           | 0.98                                                              | 1 – 45 $\mu\text{M}$   | 0.99  | CV, DPV             |

**Table S2.** Comparison of the performance and material properties of laser-carbonized electrochemical dopamine sensors using biomass-derived precursors.
